# Supplementary material
Source: publisher figshare collection journal article supplement (https://acs.figshare.com/ndownloader/files/4166743)
Supplement: Supplementary file 1 [file 4166743]

## Printable Optical Sensors Based on H-Bonded Supramolecular Cholesteric Liquid Crystal Networks

Nicole Herzer,<sup>†</sup> Hilal Guneyusu,<sup>†</sup> Dylan J.D. Davies,<sup>†</sup> Derya Yildirim,<sup>†</sup> Antonio R. Vaccaro,<sup>†</sup> Dirk J. Broer,<sup>†</sup> Cees W.M. Bastiaansen<sup>†,‡</sup> and Albertus P.H.J. Schenning<sup>\*,†</sup>

<sup>†</sup> Functional Organic Materials & Devices, Eindhoven University of Technology, PO Box 513

<sup>‡</sup> Department of Materials, Queen Mary University of London, Mile End Road, London, E1 4NS, UK.

### Experimental Section

*Film preparation:* The materials used are purchased from BASF (chiral dopant LC756), Philips (6OBA), Synthon (6OBA-M) and Merck (C6M and C6BP). The liquid crystalline components are mixed with 0.1 wt.% of inhibitor (tert.butyl-hydroquinone, Aldrich) and 0.6 wt.% photoinitiator (Irgacure 369, Ciba). Square 30 x 30 mm glass pieces were used as substrate. After cleaning with ethanol, ultrasonic bath (Branson 2510) and UV-Ozone photoreactor (Ultraviolet PR-100) treatment, the substrates are spincoated with polyimide (JSR grade AL24101) and rubbed with a velvet cloth to induce planar alignment. The solution of CLC in THF is barcoated onto the glass, with both solution and the RK Control coater temperature heated to 55 °C. The remaining THF was evaporated by placing the sample on a hot plate of 80 °C for five minutes. The curing is executed by illumination with a high intensity EXFO lamp for 100 seconds under nitrogen atmosphere.

The inkjet printing films were deposited on rubbed polyimide coated glass or TAC foil at 53 °C platen temperature. The film was placed on a hot plate at of 80 °C for five minutes to allow the remaining THF to evaporate. The curing is executed by illumination with a high intensity EXFO lamp for 100 seconds under nitrogen atmosphere.

*Formation of CLC polymer salt:* The prepared films were activated by dipping the film into a 0.05 molar KOH solution for about 10 min and subsequently drying at room temperature.

*Fabrication of water saturated CLC polymer salt:* The CLC polymer salt film was placed in water and after revealing a red color the film was removed and the water on the outside was gently removed with a tissue remaining a red film.

**Equipment:** UV-Vis spectroscopy was used to determine the SRB position of the original film. UV-Vis measurements were done in Shimadzu UV 3102 PC Spectroscope and Avantes UV-Vis spectrometer with an Avalight-Hal light source and Avaspec-2048 scanner with circularly polarized light. Infrared-spectroscopy was performed with the Varian-3100 FT-IR. Microscopy images were recorded with Leica DM6000D (in reflection without polarizers) equipped with a digital camera (Leica DFC 420C, Leica Microsystems Ltd.) and equipped with a Linkam cooling unit. Inkjet printing was performed using a piezoelectric Dimatix DMP 2800 (Dimatix-Fujifilm Inc., Santa Clara, USA), equipped with a 10 pL cartridge (DMCLCP-11601). The print head contained 16 parallel squared ( $8.6 \times 8.6 \mu\text{m}^2$ ) nozzles with a diameter of  $12.1 \mu\text{m}$ . The solution was typically printed at 30.0 V, a frequency of 5.0 kHz, and a customized wave form. The substrate holder was set to a temperature of 55 °C and the platen temperature was set to 53 °C for TAC foil and to 55 °C for polyimide coated glass slides.

## Figures

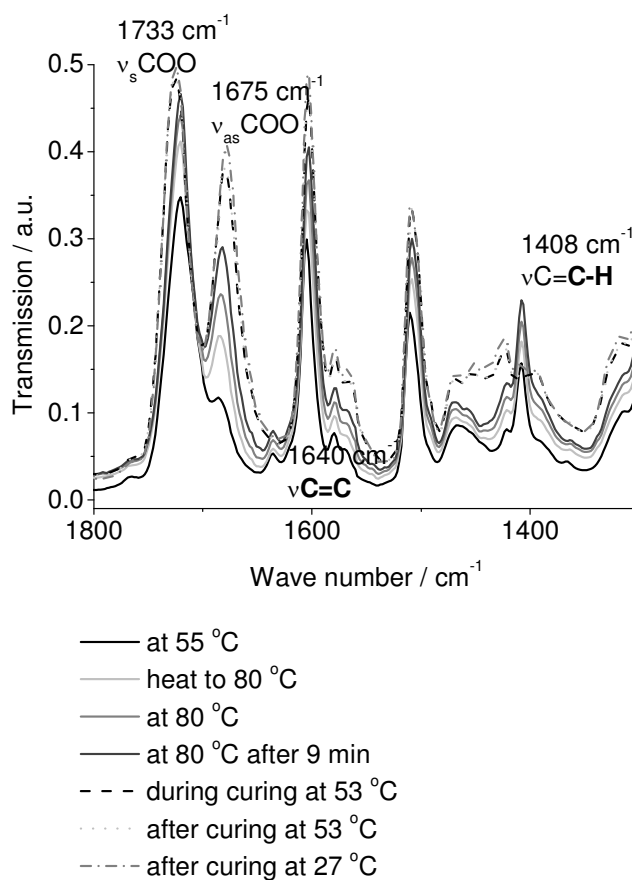

**Figure S1.** FT-IR spectra of the bar coated CLC film during the different stages of the fabrication process.

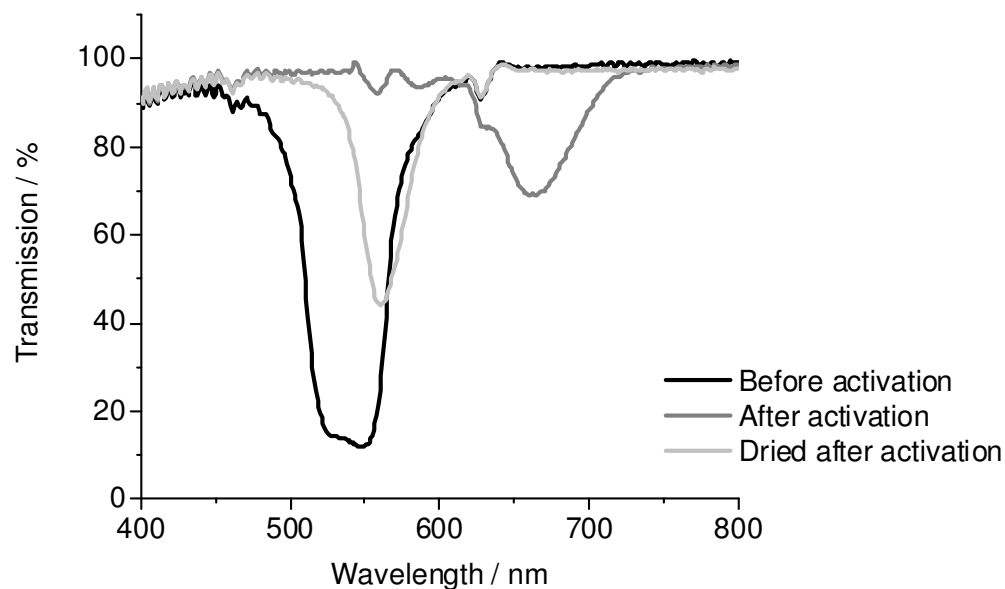

**Figure S2.** UV-VIS transmission spectra of the CLC polymer film before (black line), directly after (grey line) and dried in air after exposure to a KOH solution (light grey line).

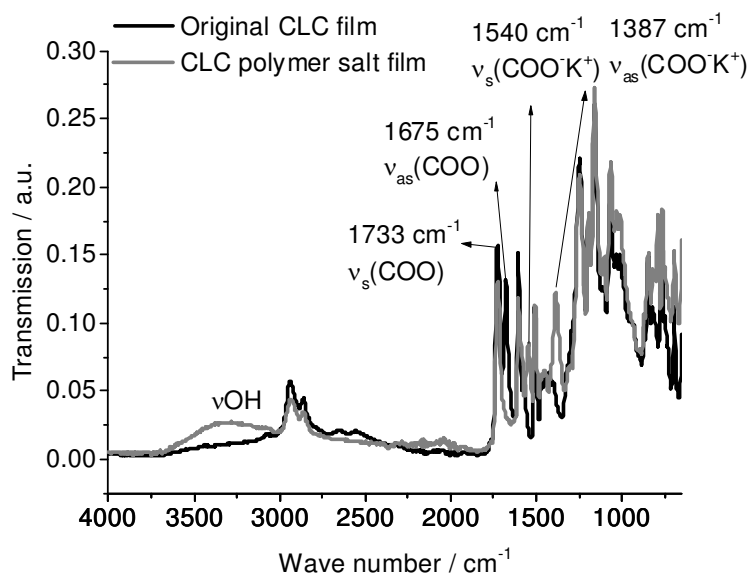

**Figure S3.** FT-IR spectra of CLC polymer film (black solid line) and after formation of the CLC polymer salt film (grey solid line).

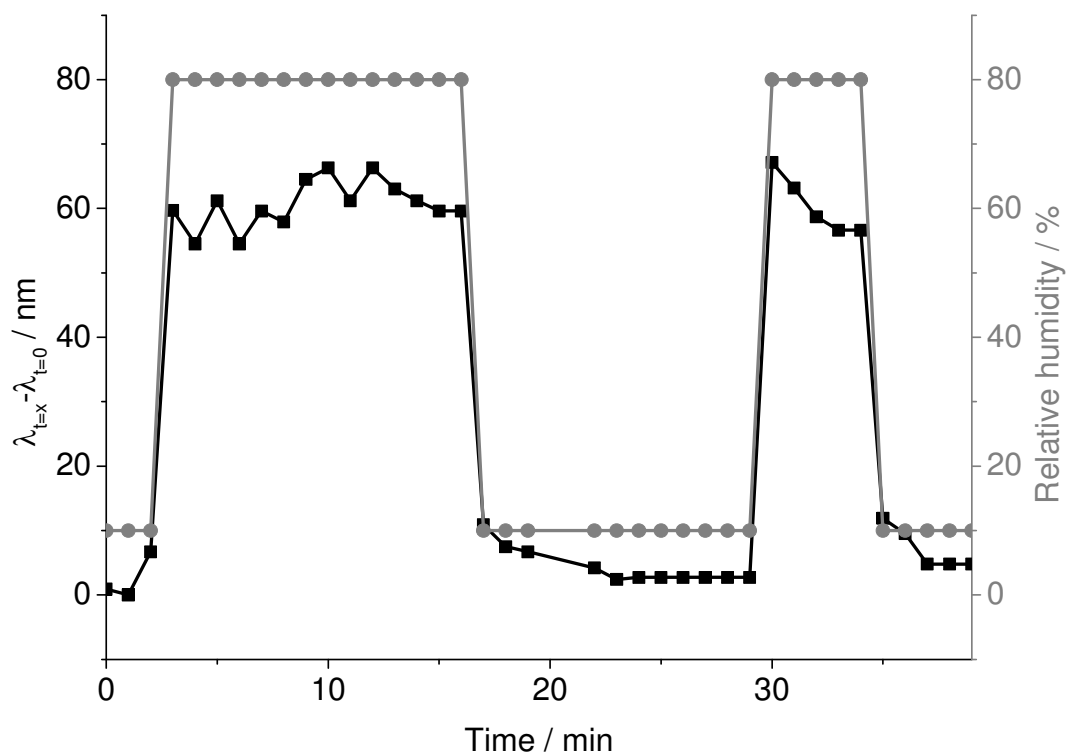

**Figure S4.** Humidity influence on SRB on the CLC polymer salt film: the relative shift of SRB to the SRB at time 0 versus time is plotted at different RH levels. The higher shift compared to the other humidity experiment is most likely caused by a slightly different preparation protocol.

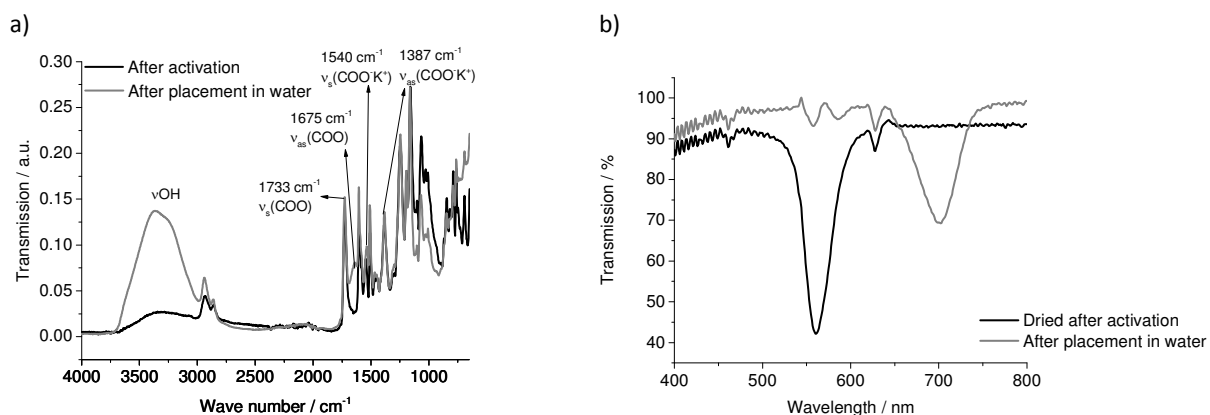

**Figure S5.** a) FT-IR spectra of the CLC polymer salt film (black line) and after placement in water (grey line); b) UV-VIS spectra of the CLC polymer salt film (black line) and after placement in water (grey line).

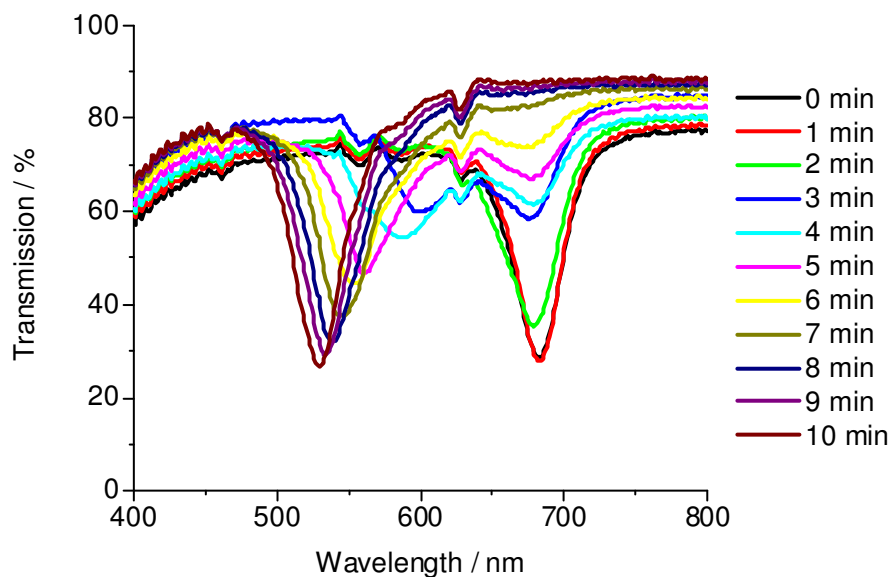

**Figure S6.** UV-Vis transmission spectra of the water-saturated CLC polymer film at room temperature as function of time.

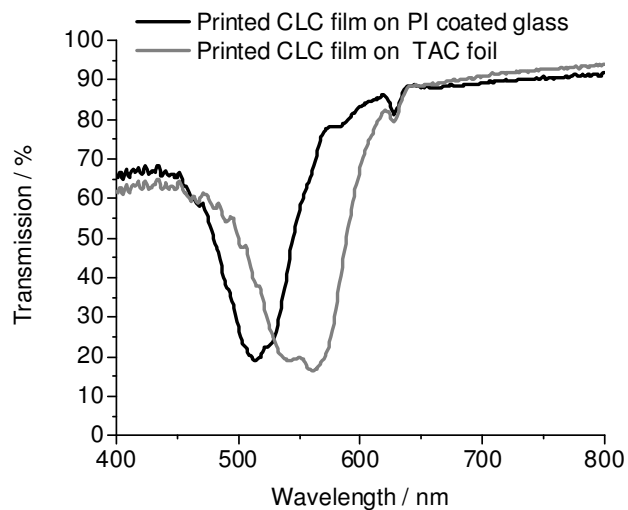

**Figure S7.** UV-Vis transmission spectra of the CLC polymer films printed on PI coated glass (black line) and on TAC foil (grey line)

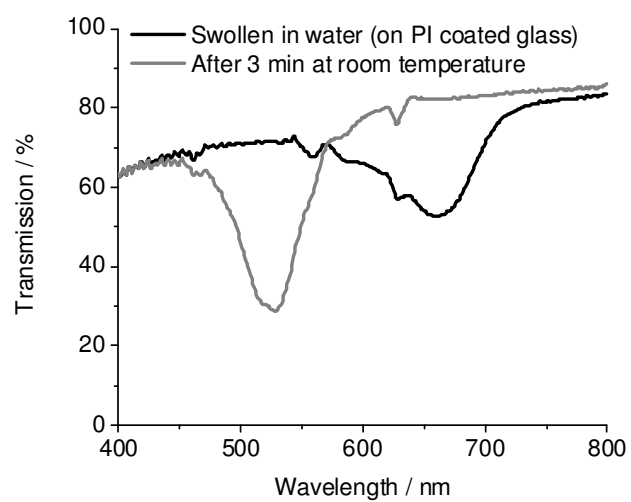

**Figure S8.** UV-VIS transmission spectra measured at room temperature of a water saturated CLC polymer salt film on PI coated glass fabricated by inkjet printing (black line) and of the same film after 3 min exposed at room temperature (grey line).
